# Supplementary material
Source: PubMed Central journal article supplement (PMC1271657)

## **Supplemental Materials and Methods**

### **Simultaneous analysis of ic $\beta$ expression and BrdU incorporation**

Simultaneous analysis of ic $\beta$  expression and BrdU incorporation in DN thymocytes required analysis of five parameters. In order to accomplish this using a FACScalibur, which has four fluorescence channels detectors, cells were surface stained with biotinylated antibody conjugates specific for mouse CD4, CD8a, CD3 $\epsilon$ , TCR $\beta$ , TCR $\gamma\delta$ , TER-119, B220, CD11b, GR-1, and NK1.1, followed by streptavidin-peridinin chlorophyll protein (PerCP) and anti-CD25 (clone PC61)-phycoerythrin (PE). Surface-stained cells were fixed, permeabilized and stained with anti-TCR $\beta$ -APC as described in Materials and Methods, and then processed as described for detection of BrdU, but staining with anti-CD44-PE-Cy5 together with anti-BrdU. Staining with anti-CD44 was performed together with anti-BrdU because the Dnase treatment required for BrdU detection was found to degrade PE-Cy5 (data not shown). DN3 and DN4 cells were defined as shown in Figures 3 and 4. Separate control stainings were also performed using the same combination of antibodies and procedures, but without anti-CD44, as well as by staining for CD25, CD44 and non-DN markers in separate fluorescence channels and omitting analysis of either BrdU or ic $\beta$ . The numbers of cells within the defined DN3 and DN4 gates as determined by the approach used for simultaneous ic $\beta$  and BrdU detection was found to be similar to that determined by the more conventional approach (data not shown).

## Supplemental Figure Legends

Figure S1. Normalization of the DN3 BrdU incorporation data presented above with respect to expression of intracellular TCR  $\beta$  chain (ic $\beta$ ). Thymocytes from the same mice analyzed for Figure 3A were separately stained for ic $\beta$  together with surface markers to define the DN3 subset. The fraction of ic $\beta^+$  DN3 cells was determined for each sample, and the mean DN3 %ic $\beta^+$  for each experiment was calculated. The percentage of BrdU-incorporating DN3 thymocytes from each mouse was then normalized as follows: %BrdU $^+$  x %ic $\beta^+$ /mean %ic $\beta^+$ .

Figure S2. Flow cytometric analysis strategy used to define DN3 thymocytes analyzed in Figure 3B. Left pseudo-color plot: E47 $^{+/-}$  thymocytes stained with the combination of anti-CD25-PE and a mix of biotinylated antibodies used to define non-DN thymocytes (described in Materials and Methods) plus streptavidin-PerCP. Right pseudo-color plot: the same thymocytes stained as in the left plot together with anti-CD44-PE-Cy5, which was detected in the same fluorescence channel as PerCp. The shift of the CD25 $^{\text{high}}$  population in the right plot indicates staining with CD44. The box drawn in each plot depicts an identical gate that defines either all of the CD25 $^{\text{high}}$  DN thymocytes (left plot), or the CD25 $^{\text{high}}$ , CD44 $^{\text{low}}$  DN3 subset (right plot).

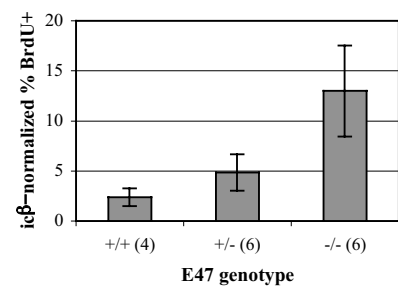

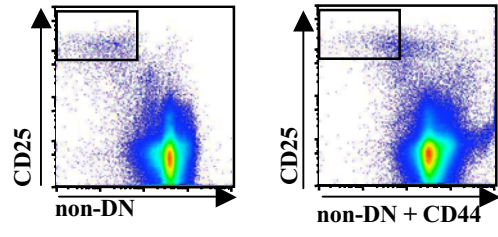

Supplement: 7600017s1.pdf [file 7600017s1.pdf]
